# Supplementary figures and images for: Development of the C12Im-Cl-assisted method for rapid sample preparation in proteomic application
Source: Royal Society of Chemistry journal article supplement (doi:10.1039/d0ay02079f), 2021-01-01

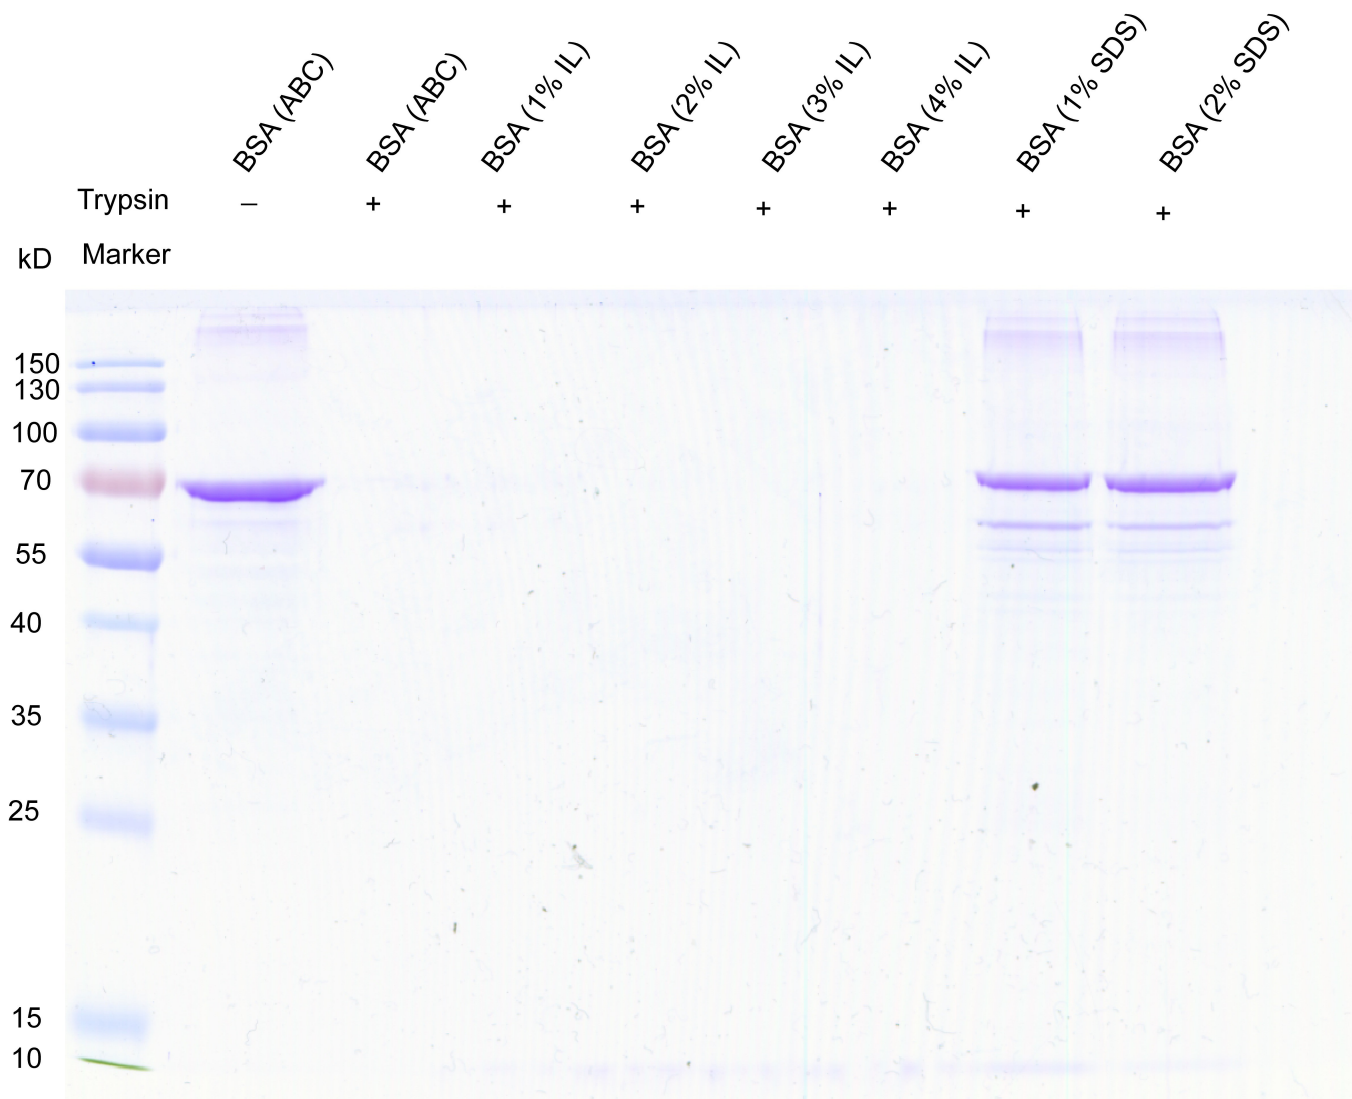

Supplement: d0ay02079f3.pdf [file d0ay02079f3.pdf]

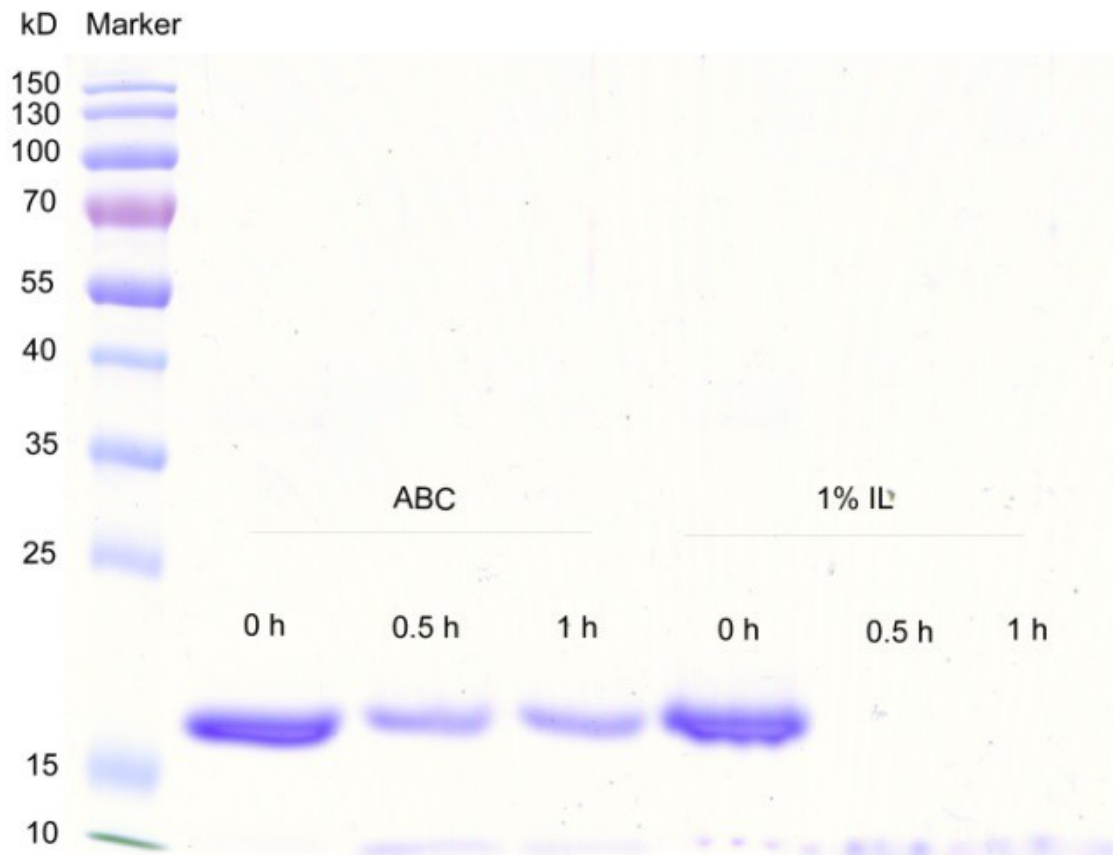

Supplement: d0ay02079f5.pdf [file d0ay02079f5.pdf]

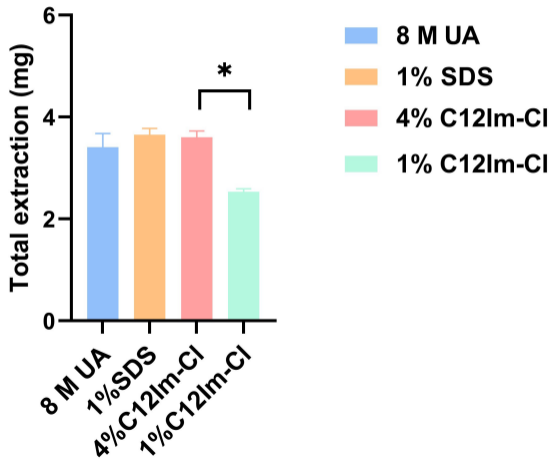

Supplement: d0ay02079f6.pdf [file d0ay02079f6.pdf]
